# Supplementary material
Source: PubMed Central journal article supplement (PMC2912962)

Efimova *et al.*  
Fig. S1

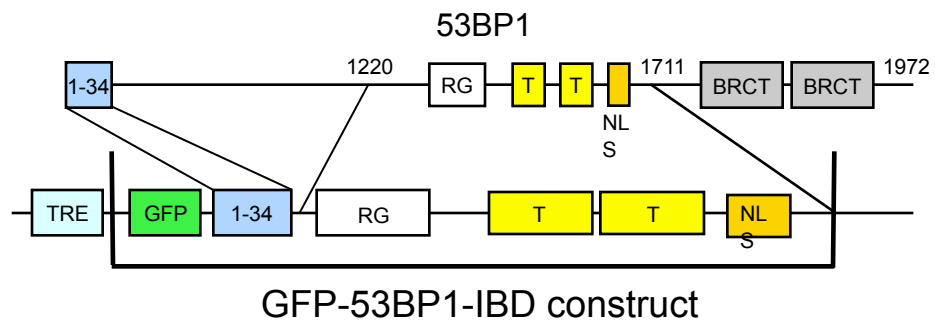

Supplement: NIHMS214965-supplement-2.pdf [file NIHMS214965-supplement-2.pdf]

Efimova *et al.*  
Fig. S2

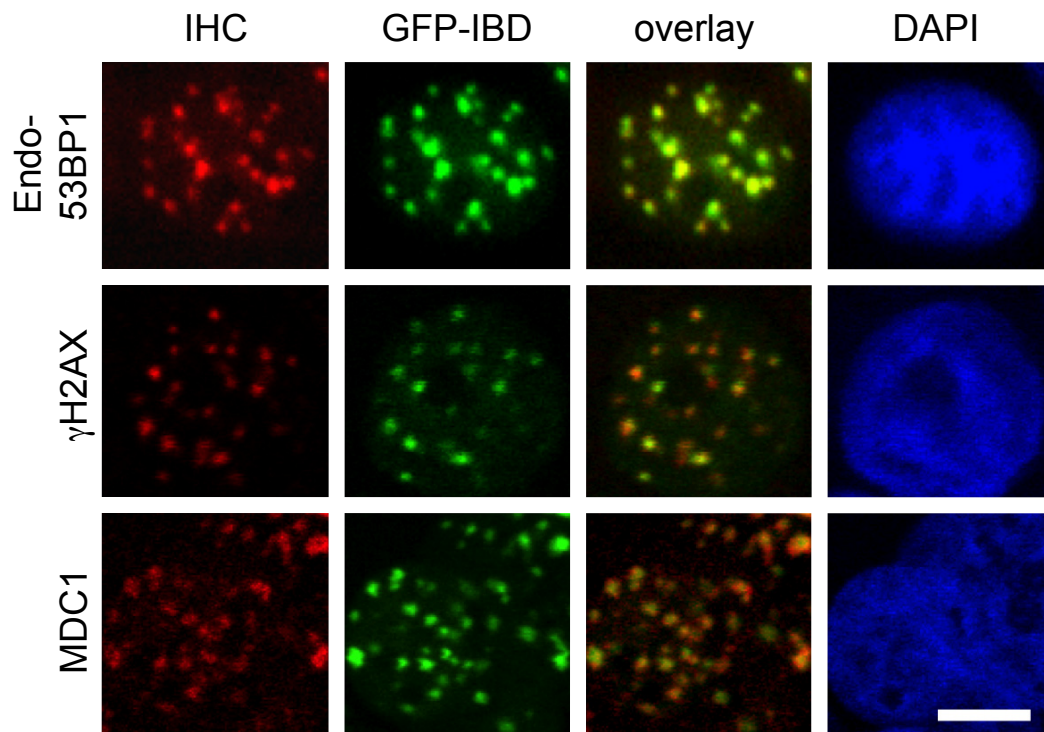

Supplement: NIHMS214965-supplement-3.pdf [file NIHMS214965-supplement-3.pdf]

Efimova *et al.*  
Fig. S3

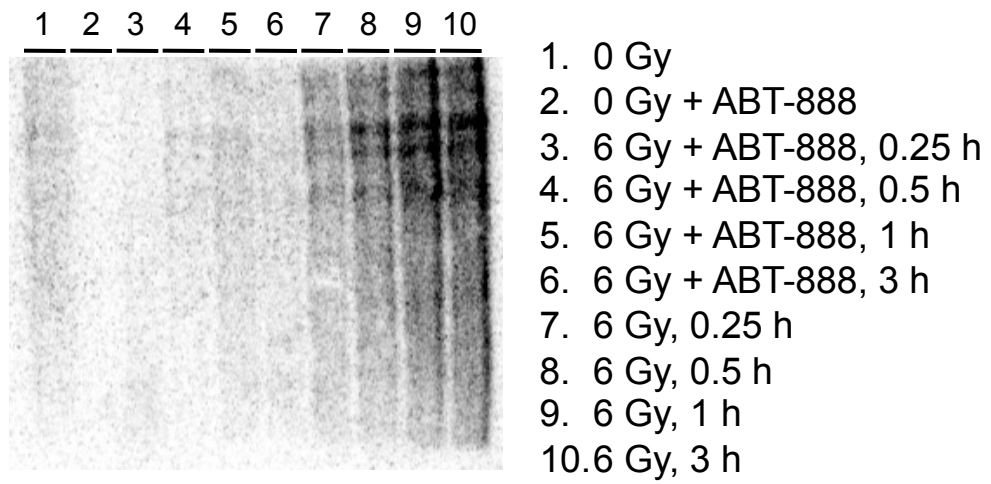

Supplement: NIHMS214965-supplement-4.pdf [file NIHMS214965-supplement-4.pdf]

Efimova *et al.*  
Fig. S4

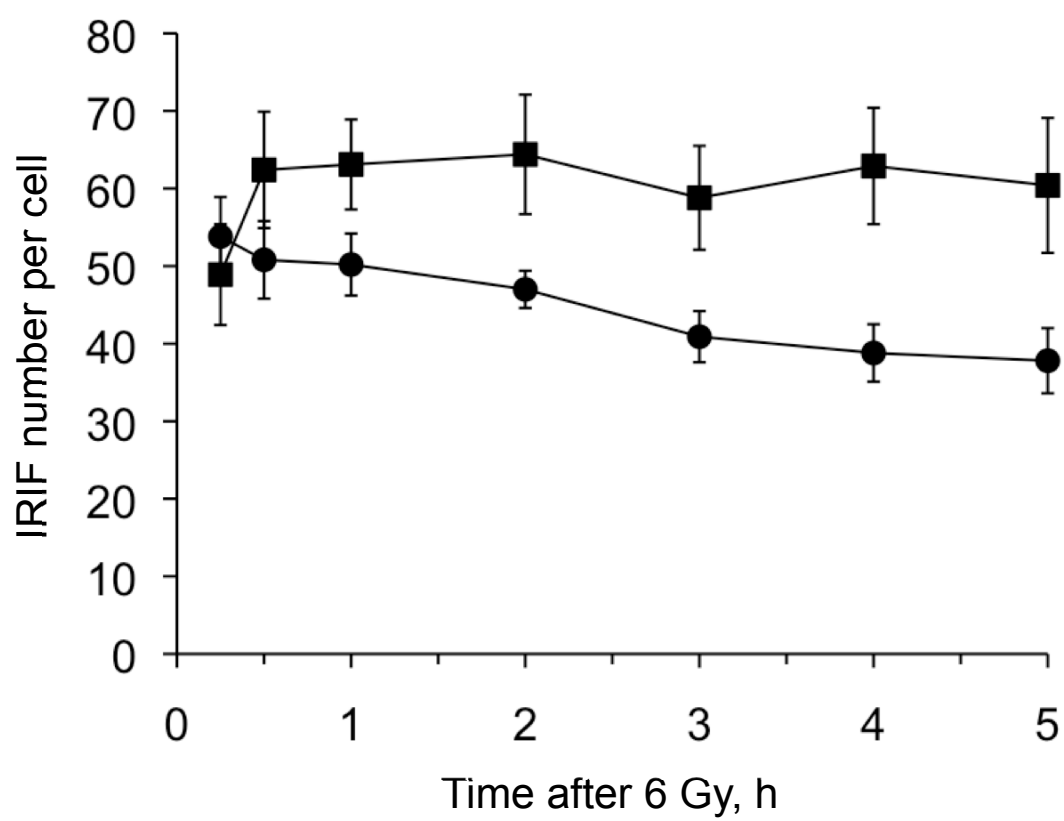

Supplement: NIHMS214965-supplement-5.pdf [file NIHMS214965-supplement-5.pdf]

Efimova *et al.*  
Fig. S5

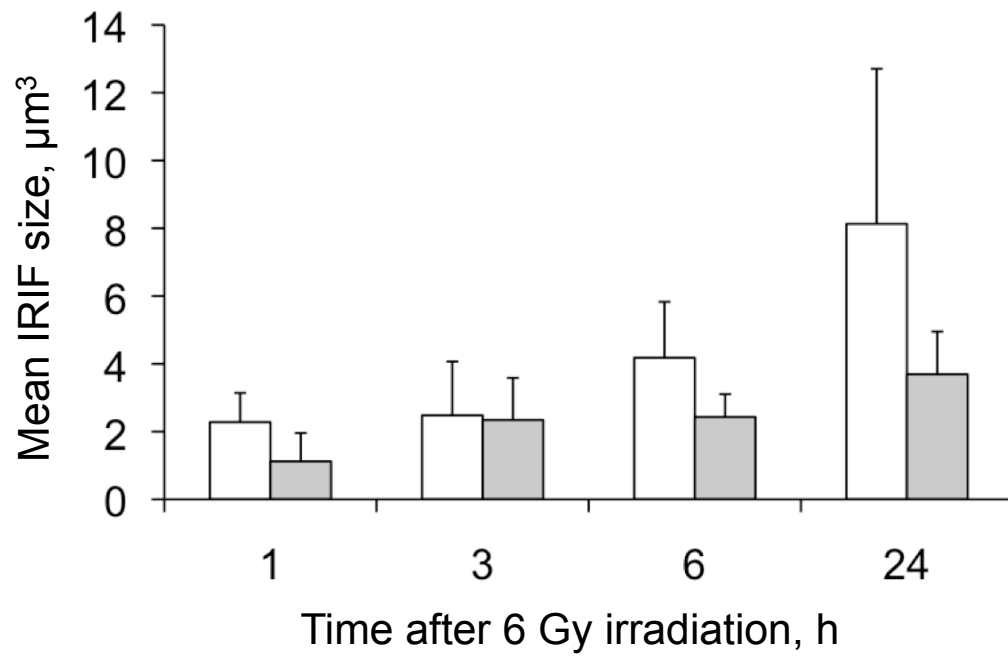

Supplement: NIHMS214965-supplement-6.pdf [file NIHMS214965-supplement-6.pdf]

Efimova *et al.*  
Fig. S6

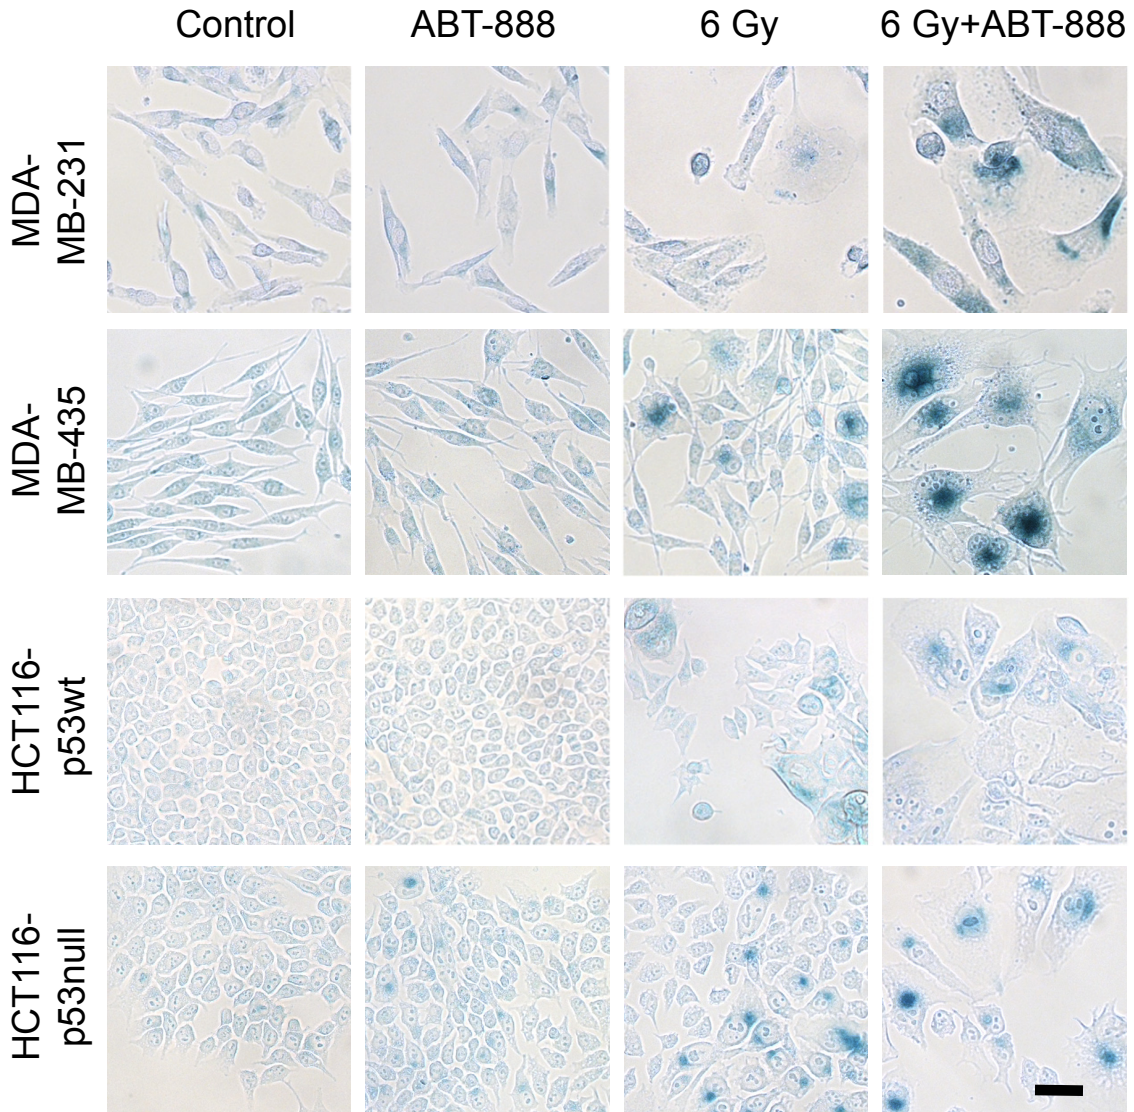

Supplement: NIHMS214965-supplement-7.pdf [file NIHMS214965-supplement-7.pdf]
